# Supplementary material for: Transcriptional variation of sensory-related genes in natural populations of Aedes albopictus
Source: Springer Nature journal article supplement (doi:10.1186/s12864-020-06956-6), 2020-08-07
Supplement: MOESM3 [file 12864_2020_6956_MOESM3_ESM.pdf]

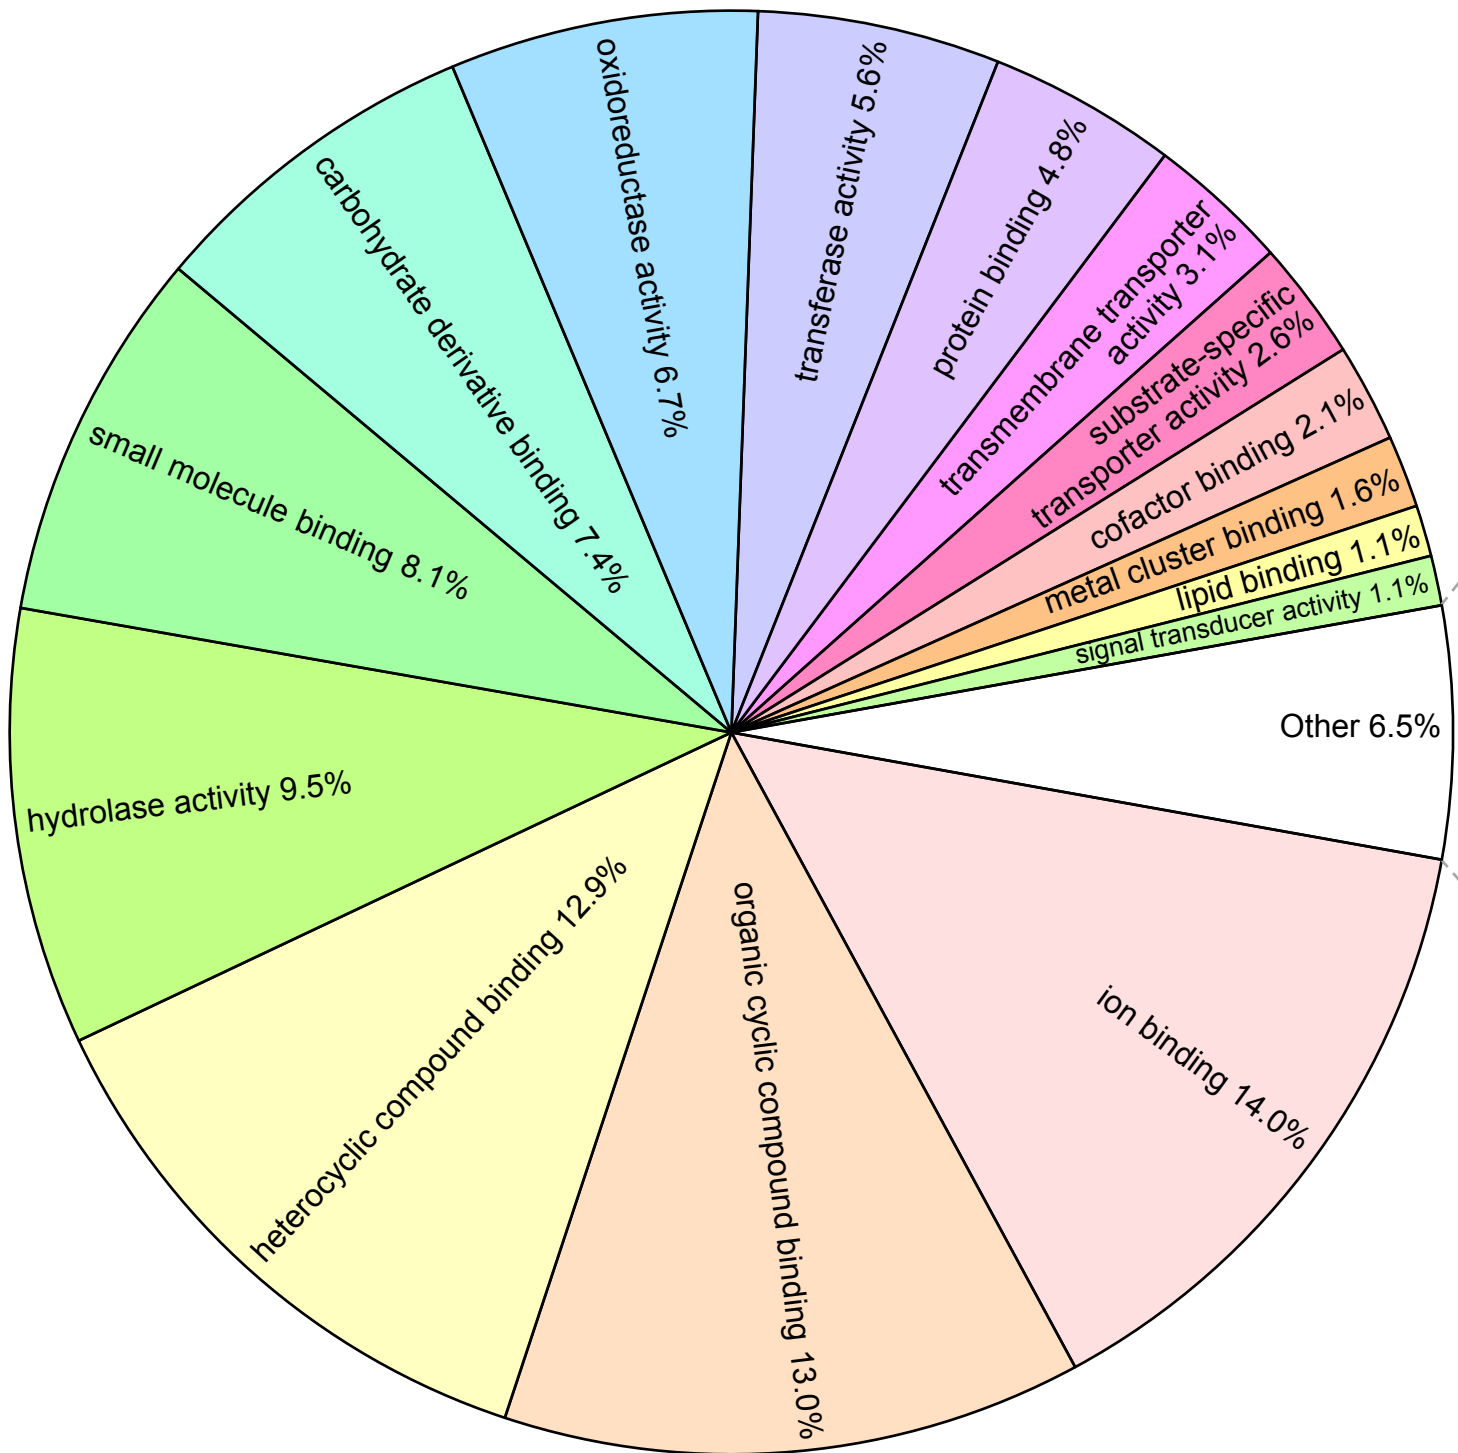

|                                                                  |
|------------------------------------------------------------------|
| sequence-specific DNA binding transcription factor activity 0.7% |
| ligase activity 0.6%                                             |
| odorant binding 0.5%                                             |
| structural constituent of cuticle 0.4%                           |
| cargo receptor activity 0.4%                                     |
| peptidase regulator activity 0.4%                                |
| carbohydrate binding 0.4%                                        |
| enzyme inhibitor activity 0.4%                                   |
| lyase activity 0.3%                                              |
| nucleoside-triphosphatase regulator activity 0.3%                |
| kinase regulator activity 0.3%                                   |
| structural constituent of cytoskeleton 0.2%                      |
| extracellular matrix structural constituent 0.2%                 |
| neurotransmitter transporter activity 0.2%                       |
| sulphur compound binding 0.2%                                    |
| isomerase activity 0.2%                                          |
| structural constituent of ribosome 0.1%                          |
| chromatin binding 0.1%                                           |
| amide binding 0.1%                                               |
| pigment binding 0.1%                                             |
| xenobiotic transporter activity 0.1%                             |
| carbohydrate derivative transporter activity 0.1%                |
| enzyme activator activity 0.1%                                   |
| drug transporter activity 0.1%                                   |
| transcription factor activity/ binding 0.1%                      |
| ribonucleoprotein complex binding 0.1%                           |
| deaminase activity 0.1%                                          |
| cyclase activity 0.1%                                            |
