# Supplementary material for: Transcriptional variation of sensory-related genes in natural populations of Aedes albopictus
Source: Springer Nature journal article supplement (doi:10.1186/s12864-020-06956-6), 2020-08-07
Supplement: MOESM5 [file 12864_2020_6956_MOESM5_ESM.pdf]

$r = 0.912$   
 $P < 0.0001$

qRT-PCR  $\text{Log}_2$  ratio

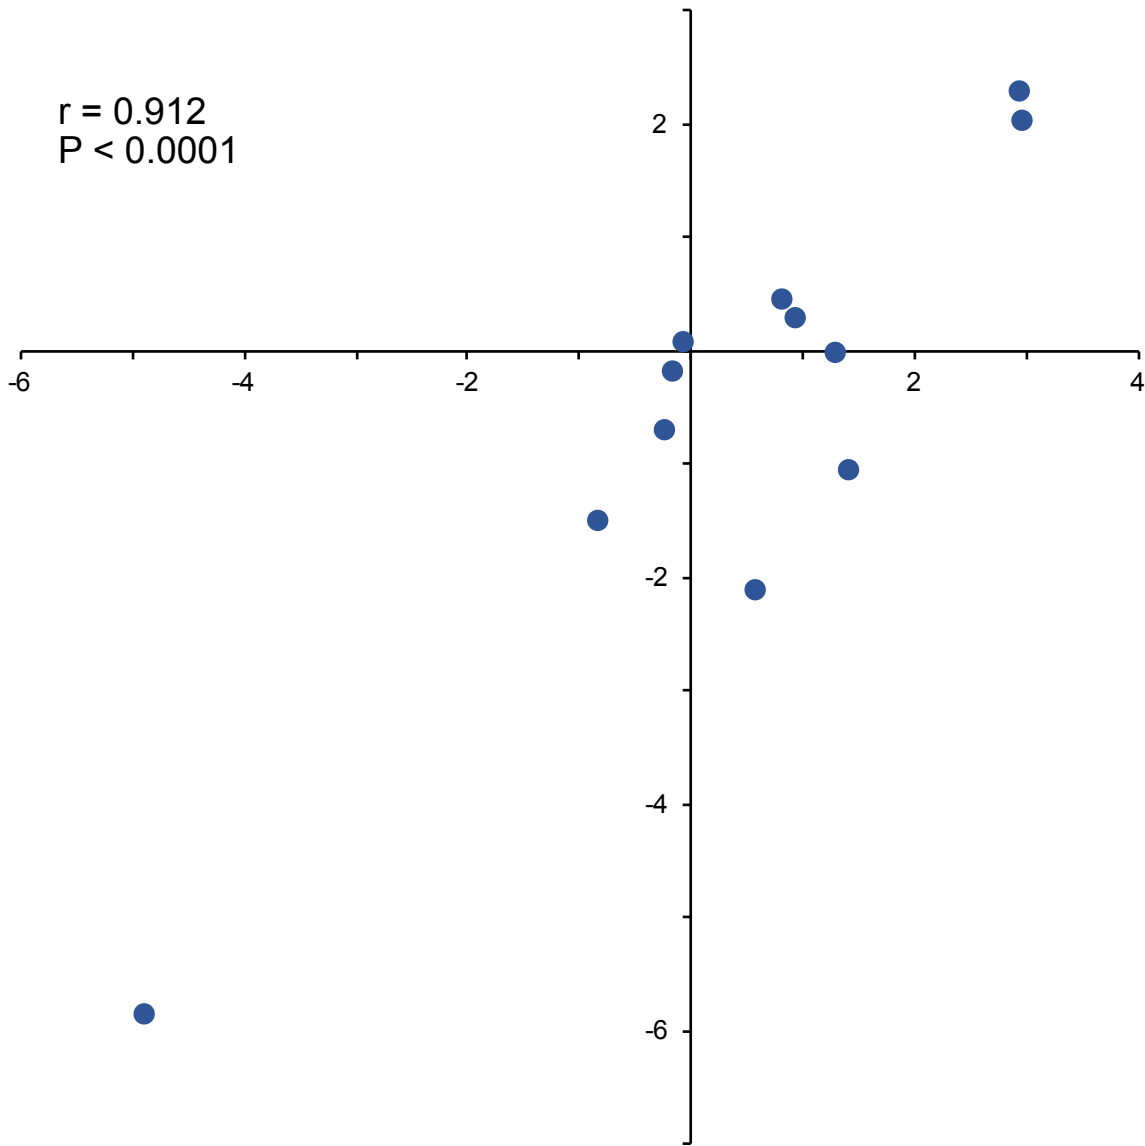

RNA-seq  $\text{Log}_2$  ratio
