# Supplementary material for: Transcriptional variation of sensory-related genes in natural populations of Aedes albopictus
Source: Springer Nature journal article supplement (doi:10.1186/s12864-020-06956-6), 2020-08-07
Supplement: MOESM8 [file 12864_2020_6956_MOESM8_ESM.pdf]

**Table S10 TBLASTN comparisons of OBPs identified in the transcriptomes and those identified by Lombardo et al. (2017)**

| Transcript | Name         | Length<br>(aa) | Transcript_Lombardo            | Name<br>Lombardo et al. | Length %<br>(aa) identity | alignment<br>length | e-value   | bit-score | Comment |
|------------|--------------|----------------|--------------------------------|-------------------------|---------------------------|---------------------|-----------|-----------|---------|
| 88094      | AalbOBP1     | 143            | AALF023075                     | AalbOBP1                | 235 94/97                 | 119                 | 3.93E-80  | 235       |         |
| 89777      | AalbOBP2     | 159            | Ae2SigPSigP-245707_FR2_11-195  | AalbOBP2                | 159 99/100                | 159                 | 4.23E-115 | 322       |         |
| 96031      | AalbOBP3     | 143            | Ae2SigPSigP-246894_FR3_61-234  | AalbOBP3                | 143 99/99                 | 143                 | 7.82E-104 | 292       |         |
| 88146      | AalbOBP4     | 147            | Ae2SigPSigP-245019_FR5_303-456 | AalbOBP4                | 147 99/99                 | 147                 | 2.28E-96  | 273       |         |
| -          | -            | -              | AALF026669                     | AalbOBP5                | 315 -                     | -                   | -         | -         |         |
| -          | -            | -              | AALF017938                     | AalbOBP7-N1             | 310 -                     | -                   | -         | -         |         |
| 4635       | AalbOBP9     | 132            | AALF024996                     | AalbOBP9                | 132 98/99                 | 132                 | 1.19E-95  | 270       |         |
| 90263      | AalbOBP10    | 140            | AALF027078                     | AalbOBP10               | 140 98/99                 | 140                 | 1.24E-101 | 286       |         |
| 88450      | AalbOBP11    | 137            | AALF007517                     | AalbOBP11               | 137 97/98                 | 137                 | 7.27E-97  | 274       |         |
| 97431      | AalbOBP12    | 132            | AALF019174                     | AalbOBP12               | 132 100/100               | 132                 | 1.08E-80  | 233       |         |
| 88277      | AalbOBP13    | 133            | AALF019175                     | AalbOBP13               | 133 99/99                 | 133                 | 1.75E-95  | 270       |         |
| 25065      | AalbOBP15    | 136            | AALF019178                     | AalbOBP15               | 136 100/100               | 136                 | 1.62E-87  | 250       |         |
| -          | -            | -              | AALF018393                     | AalbOBP16               | 270 -                     | -                   | -         | -         |         |
| 6031       | AalbOBP17    | 138            | Ae2SigPSigP-70660_FR2_3-125    | AalbOBP17               | 92 93/98                  | 92                  | 2.22E-35  | 117       |         |
| 98240      | AalbOBP18    | 141            | Ae2SigPSigP-221527_FR6_753-897 | AalbOBP18               | 141 98/99                 | 141                 | 1.68E-91  | 261       |         |
| 1010       | AalbOBP19    | 125            | AALF023074                     | AalbOBP19               | 93 99/100                 | 77                  | 2.80E-54  | 164       |         |
| 51548      | AalbOBP19-N1 | 142            | AALF025127                     | -                       | 142 98/99                 | 142                 | 1.33E-102 | 289       |         |
| 88295      | AalbOBP20/59 | 166            | AALF005057                     | AalbOBP20/59            | 166 99/99                 | 166                 | 1.29E-110 | 311       |         |
| 60064      | AalbOBP21    | 56             | AALF014342                     | AalbOBP21               | 246 100/100               | 56                  | 2.78E-36  | 120       |         |
| 2021       | AalbOBP22    | 138            | AALF014341                     | AalbOBP22               | 138 99/100                | 138                 | 5.99E-89  | 254       |         |
| 57665      | AalbOBP26/23 | 101            | AALF018601                     | AalbOBP26/23            | 237 100/100               | 101                 | 1.38E-71  | 212       |         |
| 10170      | AalbOBP25/24 | 200            | AALF018602                     | AalbOBP25/24            | 200 99/99                 | 200                 | 4.51E-117 | 330       |         |
| 95920      | AalbOBP27    | 139            | Ae2SigPSigP-218581_FR4_17-171  | AalbOBP27               | 139 98/98                 | 139                 | 3.72E-100 | 282       |         |
| -          | -            | -              | AALF022644                     | AalbOBP28               | 334 -                     | -                   | -         | -         |         |
| -          | -            | -              | AALF022642                     | AalbOBP33               | 636 -                     | -                   | -         | -         |         |
| 88172      | AalbOBP34    | 149            | AALF028521                     | AalbOBP34               | 142 99/100                | 128                 | 5.83E-80  | 232       |         |
| 86836      | AalbOBP35    | 131            | AALF013191                     | AalbOBP35               | 131 100/100               | 131                 | 6.00E-79  | 228       |         |
| 91258      | AalbOBP36    | 152            | AALF009587                     | AalbOBP36               | 152 100/100               | 152                 | 2.18E-115 | 322       |         |
| 94240      | AalbOBP37    | 149            | Ae2SigPSigP-225473_FR6_9-169   | AalbOBP37               | 149 98/99                 | 149                 | 7.65E-99  | 280       |         |
| 90197      | AalbOBP38    | 140            | Ae2SigPSigP-224714_FR1_155-257 | AalbOBP38               | 80 100/100                | 80                  | 8.37E-56  | 168       |         |
| 91445      | AalbOBP39    | 146            | AALF005090                     | AalbOBP39               | 183 98/98                 | 127                 | 1.38E-80  | 235       |         |
| -          | -            | -              | AALF008889                     | AalbOBP40               | 291 -                     | -                   | -         | -         |         |
| 88422      | AalbOBP63/42 | 157            | Ae2SigPSigP-217188_FR2_96-312  | AalbOBP63/42            | 193 100/100               | 157                 | 9.78E-116 | 325       |         |
| -          | -            | -              | AALF015687                     | AalbOBP44               | 278 -                     | -                   | -         | -         |         |
| -          | -            | -              | AALF013004                     | AalbOBP46               | 298 -                     | -                   | -         | -         |         |
| 88397      | AalbOBP47    | 191            | Ae2SigPSigP-237436_FR3_27-219  | AalbOBP47               | 191 100/100               | 191                 | 8.75E-129 | 359       |         |
| -          | -            | -              | AALF018600                     | AalbOBP48               | 213 -                     | -                   | -         | -         |         |
| -          | -            | -              | AALF020568                     | AalbOBP49               | 354 -                     | -                   | -         | -         |         |
| -          | -            | -              | AALF020569                     | AalbOBP51               | 196 -                     | -                   | -         | -         |         |
| -          | -            | -              | AALF020570                     | AalbOBP54               | 185 -                     | -                   | -         | -         |         |
| 87394      | AalbOBP55    | 151            | AALF021480                     | AalbOBP55               | 151 100/100               | 151                 | 3.99E-110 | 308       |         |

|       |              |     |                              |               |     |         |     |           |     |
|-------|--------------|-----|------------------------------|---------------|-----|---------|-----|-----------|-----|
| 88160 | AalbOBP56    | 140 | AALF026945                   | AalbOBP56     | 147 | 100/100 | 130 | 4.22E-96  | 273 |
| -     | -            | -   | AALF021771                   | AalbOBP57     | 133 | -       | -   | -         | -   |
| -     | -            | -   | AALF021668                   | AalbOBP58     | 273 | -       | -   | -         | -   |
| 92750 | AalbOBP59-N1 | 155 | AALF013539                   | -             | 129 | 97/98   | 116 | 2.17E-65  | 195 |
| 88453 | AalbOBP60    | 122 | AALF002302                   | AalbOBP60     | 145 | 99/100  | 106 | 2.37E-73  | 214 |
| 88196 | AalbOBP62    | 193 | AALF001353                   | AalbOBP62     | 149 | 100/100 | 75  | 8.27E-51  | 160 |
| -     | -            | -   | AALF019177                   | AalbOBP65     | 122 | -       | -   | -         | -   |
| 89129 | AalbOBP69    | 181 | Ae2SigPSigP-30328_FR1_5-140  | AalbOBP69     | 127 | 97/99   | 127 | 4.89E-89  | 256 |
| -     | -            | -   | AALF020565                   | AalbOBP70     | 213 | -       | -   | -         | -   |
| 74008 | AalbOBP72    | 156 | AALF013104                   | AalbOBP72     | 179 | 100/100 | 155 | 1.87E-113 | 318 |
| 57651 | AalbOBP73    | 166 | Ae2SigPSigP-31227_FR4_1-172  | AalbOBP73     | 168 | 99/100  | 166 | 5.75E-124 | 345 |
| 45154 | AalbOBP73-N1 | 169 | -                            | -             | -   | -       | -   | -         | -   |
| 78299 | AalbOBP74    | 90  | Ae2SigPSigP-29640_FR2_1-211  | AalbOBP74     | 192 | 99/99   | 90  | 1.09E-61  | 185 |
| 4806  | AalbOBP75    | 193 | AALF020567                   | AalbOBP75     | 193 | 96/99   | 193 | 7.58E-128 | 357 |
| 96930 | AalbOBP76    | 133 | Ae2SigPSigP-244899_FR6_5-155 | AalbOBP76     | 133 | 98/100  | 133 | 1.10E-96  | 273 |
| 46119 | AalbOBP77    | 120 | AALF024997                   | AalbOBP77     | 151 | 98/99   | 119 | 3.50E-85  | 244 |
| 13742 | AalbOBP78-N1 | 116 | AALF008468                   | -             | 136 | 98/99   | 116 | 1.32E-84  | 242 |
| -     | -            | -   | AALF008469                   | AalbOBP78     | 135 | -       | -   | -         | -   |
| -     | -            | -   | AALF022738                   | AalbOBP79     | 154 | -       | -   | -         | -   |
| -     | -            | -   | AALF015707                   | AalbOBP80     | 152 | -       | -   | -         | -   |
| 45987 | AalbOBP81    | 151 | AALF007787                   | AalbOBP81     | 151 | 96/99   | 151 | 1.13E-110 | 310 |
| 92539 | AalbOBP83    | 306 | AALF018890                   | AalbOBP83     | 306 | 98/99   | 306 | 2.51E-128 | 367 |
| -     | -            | -   | AALF006399                   | AalbOBP89     | 353 | -       | -   | -         | -   |
| -     | -            | -   | AALF008134                   | AalbOBP90     | 201 | -       | -   | -         | -   |
| -     | -            | -   | AALF017937                   | AalbOBP97     | 307 | -       | -   | -         | -   |
| -     | -            | -   | AALF013138                   | AalbOBP98     | 310 | -       | -   | -         | -   |
| -     | -            | -   | AALF017970                   | AalbOBP100    | 285 | -       | -   | -         | -   |
| -     | -            | -   | AALF010900                   | AalbOBP101    | 293 | -       | -   | -         | -   |
| -     | -            | -   | AALF011068                   | AalbOBP102    | 301 | -       | -   | -         | -   |
| -     | -            | -   | AALF013003                   | AalbOBP103    | 296 | -       | -   | -         | -   |
| -     | -            | -   | AALF013136                   | AalbOBP104    | 316 | -       | -   | -         | -   |
| -     | -            | -   | AALF009317                   | AalbOBP105    | 305 | -       | -   | -         | -   |
| -     | -            | -   | AALF013134                   | AalbOBP106    | 306 | -       | -   | -         | -   |
| -     | -            | -   | AALF014081                   | AalbOBP107    | 306 | -       | -   | -         | -   |
| -     | -            | -   | AALF014080                   | AalbOBP108    | 278 | -       | -   | -         | -   |
| -     | -            | -   | AALF021669                   | AalbOBP110    | 268 | -       | -   | -         | -   |
| -     | -            | -   | AALF003679                   | AalbOBP111    | 338 | -       | -   | -         | -   |
| -     | -            | -   | AALF003184                   | AalbOBP111-N1 | 291 | -       | -   | -         | -   |
| -     | -            | -   | AALF017939                   | AalbOBP112    | 299 | -       | -   | -         | -   |
| -     | -            | -   | AALF000521                   | AalbOBP113    | 273 | -       | -   | -         | -   |
| 23731 | AalbOBP-N1   | 197 | Ae2SigPSigP-20809_FR1_15-226 | -             | 197 | 100/100 | 197 | 2.86E-133 | 371 |
| 17964 | AalbOBP-N2   | 103 | -                            | -             | -   | -       | -   | -         | -   |

**Table S11 TBLASTN comparisons of Ors identified in the transcriptomes and those identified by Lombardo et al. (2017)**

| Transcript | Name         | Length (aa) | Transcript_Lombardo          | Name Lombardo et al. | Length (aa) | % identity | alignment length | e-value   | bit-score | Comment                                       |
|------------|--------------|-------------|------------------------------|----------------------|-------------|------------|------------------|-----------|-----------|-----------------------------------------------|
| 16280      | AalbOR2      | 376         | AALF011758                   | AalbOr2              | 395         | 95/95      | 395              | 0         | 753       |                                               |
| 5943       | AalbOR4      | 406         | Ae2-239510                   | AalbOr4/5            | 239         | 97/99      | 239              | 3.80E-174 | 485       |                                               |
| 82460      | AalbOR6      | 401         | AALF017217                   | AalbOr6              | 275         | 99/99      | 275              | 0         | 540       |                                               |
| 88204      | AalbOR7/ORCO | 479         | AALF000221                   | AalbOrco             | 464         | 99/100     | 464              | 0         | 902       |                                               |
| 4707       | AalbOR8      | 793         | AALF006802                   | AalbOr8              | 1488        | 98/99      | 801              | 0         | 1440      |                                               |
| -          | -            | -           | AALF007388                   | AalbOr9              | 347         | -          | -                | -         | -         |                                               |
| -          | -            | -           | AALF004497                   | AalbOr9a             | 583         | -          | -                | -         | -         |                                               |
| 8503       | AalbOR10     | 375         | AALF007898                   | AalbOr10             | 375         | 99/99      | 375              | 0         | 703       |                                               |
| 95352      | AalbOR11     | 420         | Ae2-240598                   | AalbOr11             | 420         | 99/100     | 420              | 0         | 847       |                                               |
| 83056      | AalbOR13     | 389         | AALF017037                   | AalbOr13             | 389         | 99/99      | 389              | 0         | 766       |                                               |
| 9257       | AalbOR15     | 390         | AALF010978                   | AalbOr15             | 403         | 99/100     | 390              | 0         | 797       |                                               |
| 92214      | AalbOR19     | 400         | AALF013368                   | AalbOr18/19          | 251         | 95/97      | 154              | 5.29E-103 | 305       |                                               |
| 84246      | AalbOR20     | 396         | -                            | -                    | -           | -          | -                | -         | -         |                                               |
| 47088      | AalbOR21     | 396         | -                            | -                    | -           | -          | -                | -         | -         |                                               |
| 17244      | AalbOR22/N1  | 385         | AALF001943                   | AalbOr-N1            | 390         | 92/93      | 385              | 0         | 719       | Identical except for an internal 33aa stretch |
| 5704       | AalbOR23     | 402         | AALF018383                   | AalbOr23             | 349         | 99/99      | 335              | 0         | 660       |                                               |
| 16397      | AalbOR24     | 395         | AALF021484                   | AalbOr24             | 263         | 99/99      | 263              | 0         | 509       |                                               |
| 19286      | AalbOR24-N1  | 180         | -                            | -                    | -           | -          | -                | -         | -         |                                               |
| 84055      | AalbOR25     | 381         | -                            | -                    | -           | -          | -                | -         | -         |                                               |
| 85326      | AalbOR26     | 401         | Ae2-246982                   | AalbOr26             | 260         | 99/100     | 260              | 0         | 544       |                                               |
| 80773      | AalbOR27     | 139         | AALF019852                   | AalbOr27             | 330         | 100/100    | 139              | 1.09E-100 | 291       |                                               |
| 88595      | AalbOR29     | 384         | Ae2-261366                   | ND                   | 383         | 99/99      | 383              | 0         | 712       |                                               |
| 17821      | AalbOR30     | 384         | AALF020411                   | AalbOr30             | 384         | 83/92      | 384              | 0         | 632       |                                               |
| 84635      | AalbOR31     | 403         | Ae2-241221                   | AalbOr31             | 353         | 98/99      | 332              | 0         | 662       |                                               |
| 81229      | AalbOR33     | 395         | -                            | -                    | -           | -          | -                | -         | -         |                                               |
| -          | -            | -           | AALF000550                   | AalbOr34             | 388         | -          | -                | -         | -         |                                               |
| -          | -            | -           | AALF000551                   | AalbOr37             | 286         | -          | -                | -         | -         |                                               |
| 4286       | AalbOR39     | 406         | AALF019769                   | AalbOr39             | 457         | 98/99      | 393              | 0         | 804       |                                               |
| 10769      | AalbOR42     | 391         | Ae2SigPSigP-212053_FR3_1-374 | AalbOr42             | 314         | 99/99      | 314              | 0         | 637       |                                               |
| 80037      | AalbOR42-N1  | 386         | -                            | -                    | -           | -          | -                | -         | -         |                                               |
| 15665      | AalbOR44     | 385         | Ae2SigPSigP-640_FR2_104-223  | ND                   | ?           | 100        | 100              | 3.00E-49  | 160       |                                               |
| 5267       | AalbOR45     | 381         | -                            | -                    | -           | -          | -                | -         | -         |                                               |
| 18518      | AalbOR45-N1  | 207         | AALF002781                   | ND                   | 262         | 100/100    | 111              | 1.05E-61  | 192       |                                               |
| -          | -            | -           | AALF013594                   | AalbOr46             | 384         | -          | -                | -         | -         |                                               |
| -          | -            | ND          | AALF007975                   | AalbOr47             | -           | -          | -                | -         | -         | Sequence not available in Lombardo et al.     |
| -          | -            | -           | AALF019854                   | AalbOr47-N1          | 114         | -          | -                | -         | -         |                                               |
| 97870      | AalbOR47-N2  | 383         | Ae2-241229                   | ND                   | 287         | 100/100    | 286              | 0         | 574       |                                               |
| 56511      | AalbOR47-N3  | 170         | -                            | -                    | -           | -          | -                | -         | -         |                                               |
| -          | -            | -           | AALF015303                   | AalbOr48             | 397         | -          | -                | -         | -         |                                               |
| -          | -            | -           | AALF025037                   | AalbOr49             | 401         | -          | -                | -         | -         |                                               |
| -          | -            | -           | AALF007974                   | AalbOr50             | -           | -          | -                | -         | -         |                                               |

|       |             |     |                                |             |     |         |     |           |                                           |
|-------|-------------|-----|--------------------------------|-------------|-----|---------|-----|-----------|-------------------------------------------|
| 7041  | AalbOR50-N1 | 257 | AALF019855                     | AalbOr50-N1 | 365 | 94/96   | 161 | 1.00E-107 | 316                                       |
| 5118  | AalbOR52    | 421 | Ae2SigPSigP-256023_FR6_86-173  | AalbOr52    | 82  | 100/100 | 82  | 8.00E-56  | 178                                       |
| 70366 | AalbOR55    | 395 | Ae2-89582                      | AalbOr55    | 199 | 99/100  | 199 | 2.45E-149 | 420                                       |
| -     | -           | -   | AALF012995                     | AalbOr58    | 398 | -       | -   | -         | -                                         |
| 1114  | AalbOR59    | 250 | AALF000962                     | AalbOr59    | 415 | 98/99   | 250 | 0         | 514                                       |
| -     | -           | -   | AALF003917                     | AalbOr60    | 418 | -       | -   | -         | -                                         |
| -     | -           | -   | AALF018937                     | AalbOr61    | 254 | -       | -   | -         | -                                         |
| -     | -           | -   | AALF018936                     | AalbOr61-N1 | 186 | -       | -   | -         | -                                         |
| -     | -           | -   | AALF003919                     | AalbOr61-N2 | 421 | -       | -   | -         | -                                         |
| -     | -           | -   | AALF003920                     | AalbOr61-N3 | 376 | -       | -   | -         | -                                         |
| 69237 | AalbOR62    | 375 | AALF000278                     | AalbOr62    | 345 | 96/98   | 345 | 0         | 678                                       |
| 4058  | AalbOR63    | 286 | AALF012784                     | AalbOr63    | 356 | 100/100 | 246 | 1.78E-163 | 457                                       |
| -     | -           | ND  | AALF026720                     | AalbOr63-N1 | -   | -       | -   | -         | Sequence not available in Lombardo et al. |
| 89176 | AalbOR63-N2 | 404 | Ae2SigPSigP-261786_FR6_1-222   | ND          | 210 | 98/99   | 210 | 1.29E-147 | 416                                       |
| 696   | AalbOR66    | 389 | -                              | -           | -   | -       | -   | -         | -                                         |
| 45285 | AalbOR67    | 60  | AALF014651                     | AalbOr67    | 383 | 100/100 | 60  | 6.21E-38  | 128                                       |
| 47052 | AalbOR69    | 385 | AALF019062                     | AalbOr69    | 342 | 89/89   | 385 | 0         | 673                                       |
| 73112 | AalbOR70    | 199 | Ae2SigPSigP-43314_FR6_155-284  | AalbOR70    | 110 | 100/100 | 99  | 2.66E-45  | 145                                       |
| 10463 | AalbOR70-N1 | 385 | AALF019061                     | AalbOr70-N1 | 320 | 100/100 | 254 | 0         | 524                                       |
| 81174 | AalbOR70-N2 | 385 | -                              | -           | -   | -       | -   | -         | -                                         |
| 13202 | AalbOR71    | 422 | AALF008906                     | AalbOr71    | 377 | 89/89   | 422 | 0         | 687                                       |
| 6552  | AalbOR72    | 412 | AALF004843                     | AalbOr72    | 413 | 93/96   | 412 | 0         | 794                                       |
| 5361  | AalbOR72-N1 | 358 | Ae2-230246                     | AalbOr72-N1 | 233 | 91/96   | 233 | 1.96E-160 | 448                                       |
| -     | -           | -   | AALF012994                     | AalbOr74    | 401 | -       | -   | -         | -                                         |
| 69694 | AalbOR75    | 96  | AALF000084                     | AalbOr75    | 703 | 100/100 | 96  | 5.32E-62  | 199                                       |
| 6097  | AalbOR76    | 225 | AALF019149                     | AalbOr76    | 381 | 96/99   | 225 | 3.32E-161 | 450                                       |
| -     | -           | -   | AALF000088                     | AalbOr78    | 400 | -       | -   | -         | -                                         |
| 9669  | AalbOR79    | 395 | AALF019151                     | AalbOr79    | 395 | 98/99   | 395 | 0         | 803                                       |
| 3076  | AalbOR80    | 422 | Ae2-239710                     | AalbOr80    | 273 | 99/99   | 273 | 0         | 538                                       |
| 97462 | AalbOR81    | 423 | Ae2SigPSigP-1103_FR4_35-441    | AalbOr81    | 350 | 97/98   | 350 | 0         | 667                                       |
| -     | -           | -   | AALF005181                     | AalbOr81-N1 | 204 | -       | -   | -         | -                                         |
| -     | -           | -   | AALF027084                     | AalbOr81-N2 | 401 | -       | -   | -         | -                                         |
| 18076 | AalbOR83c   | 353 | AALF012785                     | AalbOr83c   | 401 | 98/99   | 353 | 0         | 666                                       |
| 83353 | AalbOR84    | 410 | Ae2SigPSigP-208879_FR6_150-233 | AalbOr84    | 74  | 100/100 | 74  | 3.76E-34  | 121                                       |
| 89654 | AalbOR85    | 416 | AALF019254                     | AalbOr85    | 416 | 99/99   | 416 | 0         | 778                                       |
| 89563 | AalbOR87    | 424 | -                              | -           | -   | -       | -   | -         | -                                         |
| 445   | AalbOR87-N1 | 353 | -                              | -           | -   | -       | -   | -         | -                                         |
| 89562 | AalbOR87-N2 | 288 | -                              | -           | -   | -       | -   | -         | -                                         |
| 92688 | AalbOR88    | 408 | Ae2-216959                     | AalbOr88    | 308 | 99/99   | 308 | 0         | 591                                       |
| 47016 | AalbOR91    | 102 | Ae2SigPSigP-221634_FR2_1-400   | AalbOr91    | 362 | 99/100  | 102 | 3.23E-69  | 210                                       |
| -     | -           | -   | AALF010815                     | AalbOr92a   | 387 | -       | -   | -         | -                                         |
| 84524 | AalbOR94    | 123 | Ae2SigPSigP-73945_FR4_1-319    | AalbOr94    | 281 | 98/99   | 123 | 2.64E-85  | 249                                       |
| 53071 | AalbOR94-N1 | 172 | -                              | -           | -   | -       | -   | -         | -                                         |
| -     | -           | -   | Ae2SigPSigP-93163_FR5_1-272    | AalbOr95    | 261 | -       | -   | -         | -                                         |
| 56211 | AalbOR97    | 101 | Ae2-5507                       | AalbOr97    | 391 | 97/97   | 101 | 2.04E-63  | 196                                       |
| 50344 | AalbOR99    | 283 | AALF017530                     | AalbOr99    | 382 | 99/99   | 283 | 1.33E-176 | 491                                       |

|       |              |     |                                |              |     |         |     |           |     |
|-------|--------------|-----|--------------------------------|--------------|-----|---------|-----|-----------|-----|
| 96847 | AalbOR100    | 415 | Ae2SigPSigP-40415_FR4_1-122    | ND           | 86  | 97/97   | 86  | 1.00E-51  | 167 |
| 26945 | AalbOR101    | 210 | -                              | -            | -   | -       | -   | -         | -   |
| 9171  | AalbOR102    | 363 | -                              | -            | -   | -       | -   | -         | -   |
|       |              |     | Ae2-229490                     | AalbOr104    | 234 |         |     |           |     |
| 96630 | AalbOR104-N1 | 405 | Ae2-229489                     | ND           | 249 | 98/99   | 249 | 0.00E+00  | 506 |
| 17596 | AalbOR109    | 150 | -                              | -            | -   | -       | -   | -         | -   |
| 47815 | AalbOR110    | 244 | -                              | -            | -   | -       | -   | -         | -   |
| 97176 | AalbOR111    | 421 | AALF016854                     | AalbOr111    | 379 | 98/99   | 372 | 0         | 766 |
| 97175 | AalbOR111-N1 | 420 | Ae2-259585                     | AalbOr111-N1 | 337 | 99/99   | 337 | 0         | 698 |
| 82645 | AalbOR113    | 418 | AALF027387                     | AalbOr113    | 375 | 99/99   | 375 | 0         | 770 |
| -     | -            | -   | AALF027386                     | AalbOr113-N1 | 729 | -       | -   | -         | -   |
| 84373 | AalbOR113-N2 | 157 | AALF027388                     | AalbOr113-N2 | 463 | 92/97   | 157 | 4.88E-103 | 302 |
| 5235  | AalbOR115    | 230 | Ae2-171283                     | AalbOr115    | 295 | 96/97   | 119 | 1.14E-79  | 240 |
| -     | -            | -   | AALF010412                     | AalbOr117    | 327 | -       | -   | -         | -   |
| 45911 | AalbOR117-N1 | 169 | AALF010302                     | AalbOr117-N1 | 321 | 99/100  | 167 | 6.42E-123 | 348 |
| 15754 | AalbOR117-N2 | 415 | -                              | -            | -   | -       | -   | -         | -   |
| 7651  | AalbOR117-N3 | 160 | -                              | -            | -   | -       | -   | -         | -   |
| 56571 | AalbOR117-N4 | 417 | -                              | -            | -   | -       | -   | -         | -   |
| 44012 | -            | 70  | Ae2-15544                      | AalbOr119    | 357 | 93/94   | 70  | 3.00E-36  | 124 |
| 53133 | AalbOR121    | 421 | -                              | -            | -   | -       | -   | -         | -   |
| 16771 | AalbOR122    | 406 | -                              | -            | -   | -       | -   | -         | -   |
| 71045 | AalbOR123    | 376 | -                              | -            | -   | -       | -   | -         | -   |
| 84576 | AalbOR125    | 310 | AALF008015                     | AalbOr125    | 382 | 98/99   | 310 | 0         | 639 |
| -     | -            | -   | AALF012996                     | AalbOr-N2    | 377 | -       | -   | -         | -   |
| 41443 | AalbOR-N3    | 58  | AALF014266                     | AalbOr-N3    | 354 | 100/100 | 58  | 4.49E-34  | 117 |
| -     | -            | -   | AALF004018                     | AalbOr-N4    | 372 | -       | -   | -         | -   |
| 86662 | AalbOR-N5    | 416 | AALF000712                     | ND           | 416 | 96/98   | 416 | 0         | 798 |
| 401   | AalbOR-N6    | 413 | -                              | -            | -   | -       | -   | -         | -   |
| 3853  | AalbOR-N7    | 414 | Ae2SigPSigP-261748_FR3_290-425 | ND           | 98  | 100/100 | 98  | 2.61E-66  | 206 |
