# Supplementary material for: Transcriptional variation of sensory-related genes in natural populations of Aedes albopictus
Source: Springer Nature journal article supplement (doi:10.1186/s12864-020-06956-6), 2020-08-07
Supplement: MOESM9 [file 12864_2020_6956_MOESM9_ESM.pdf]

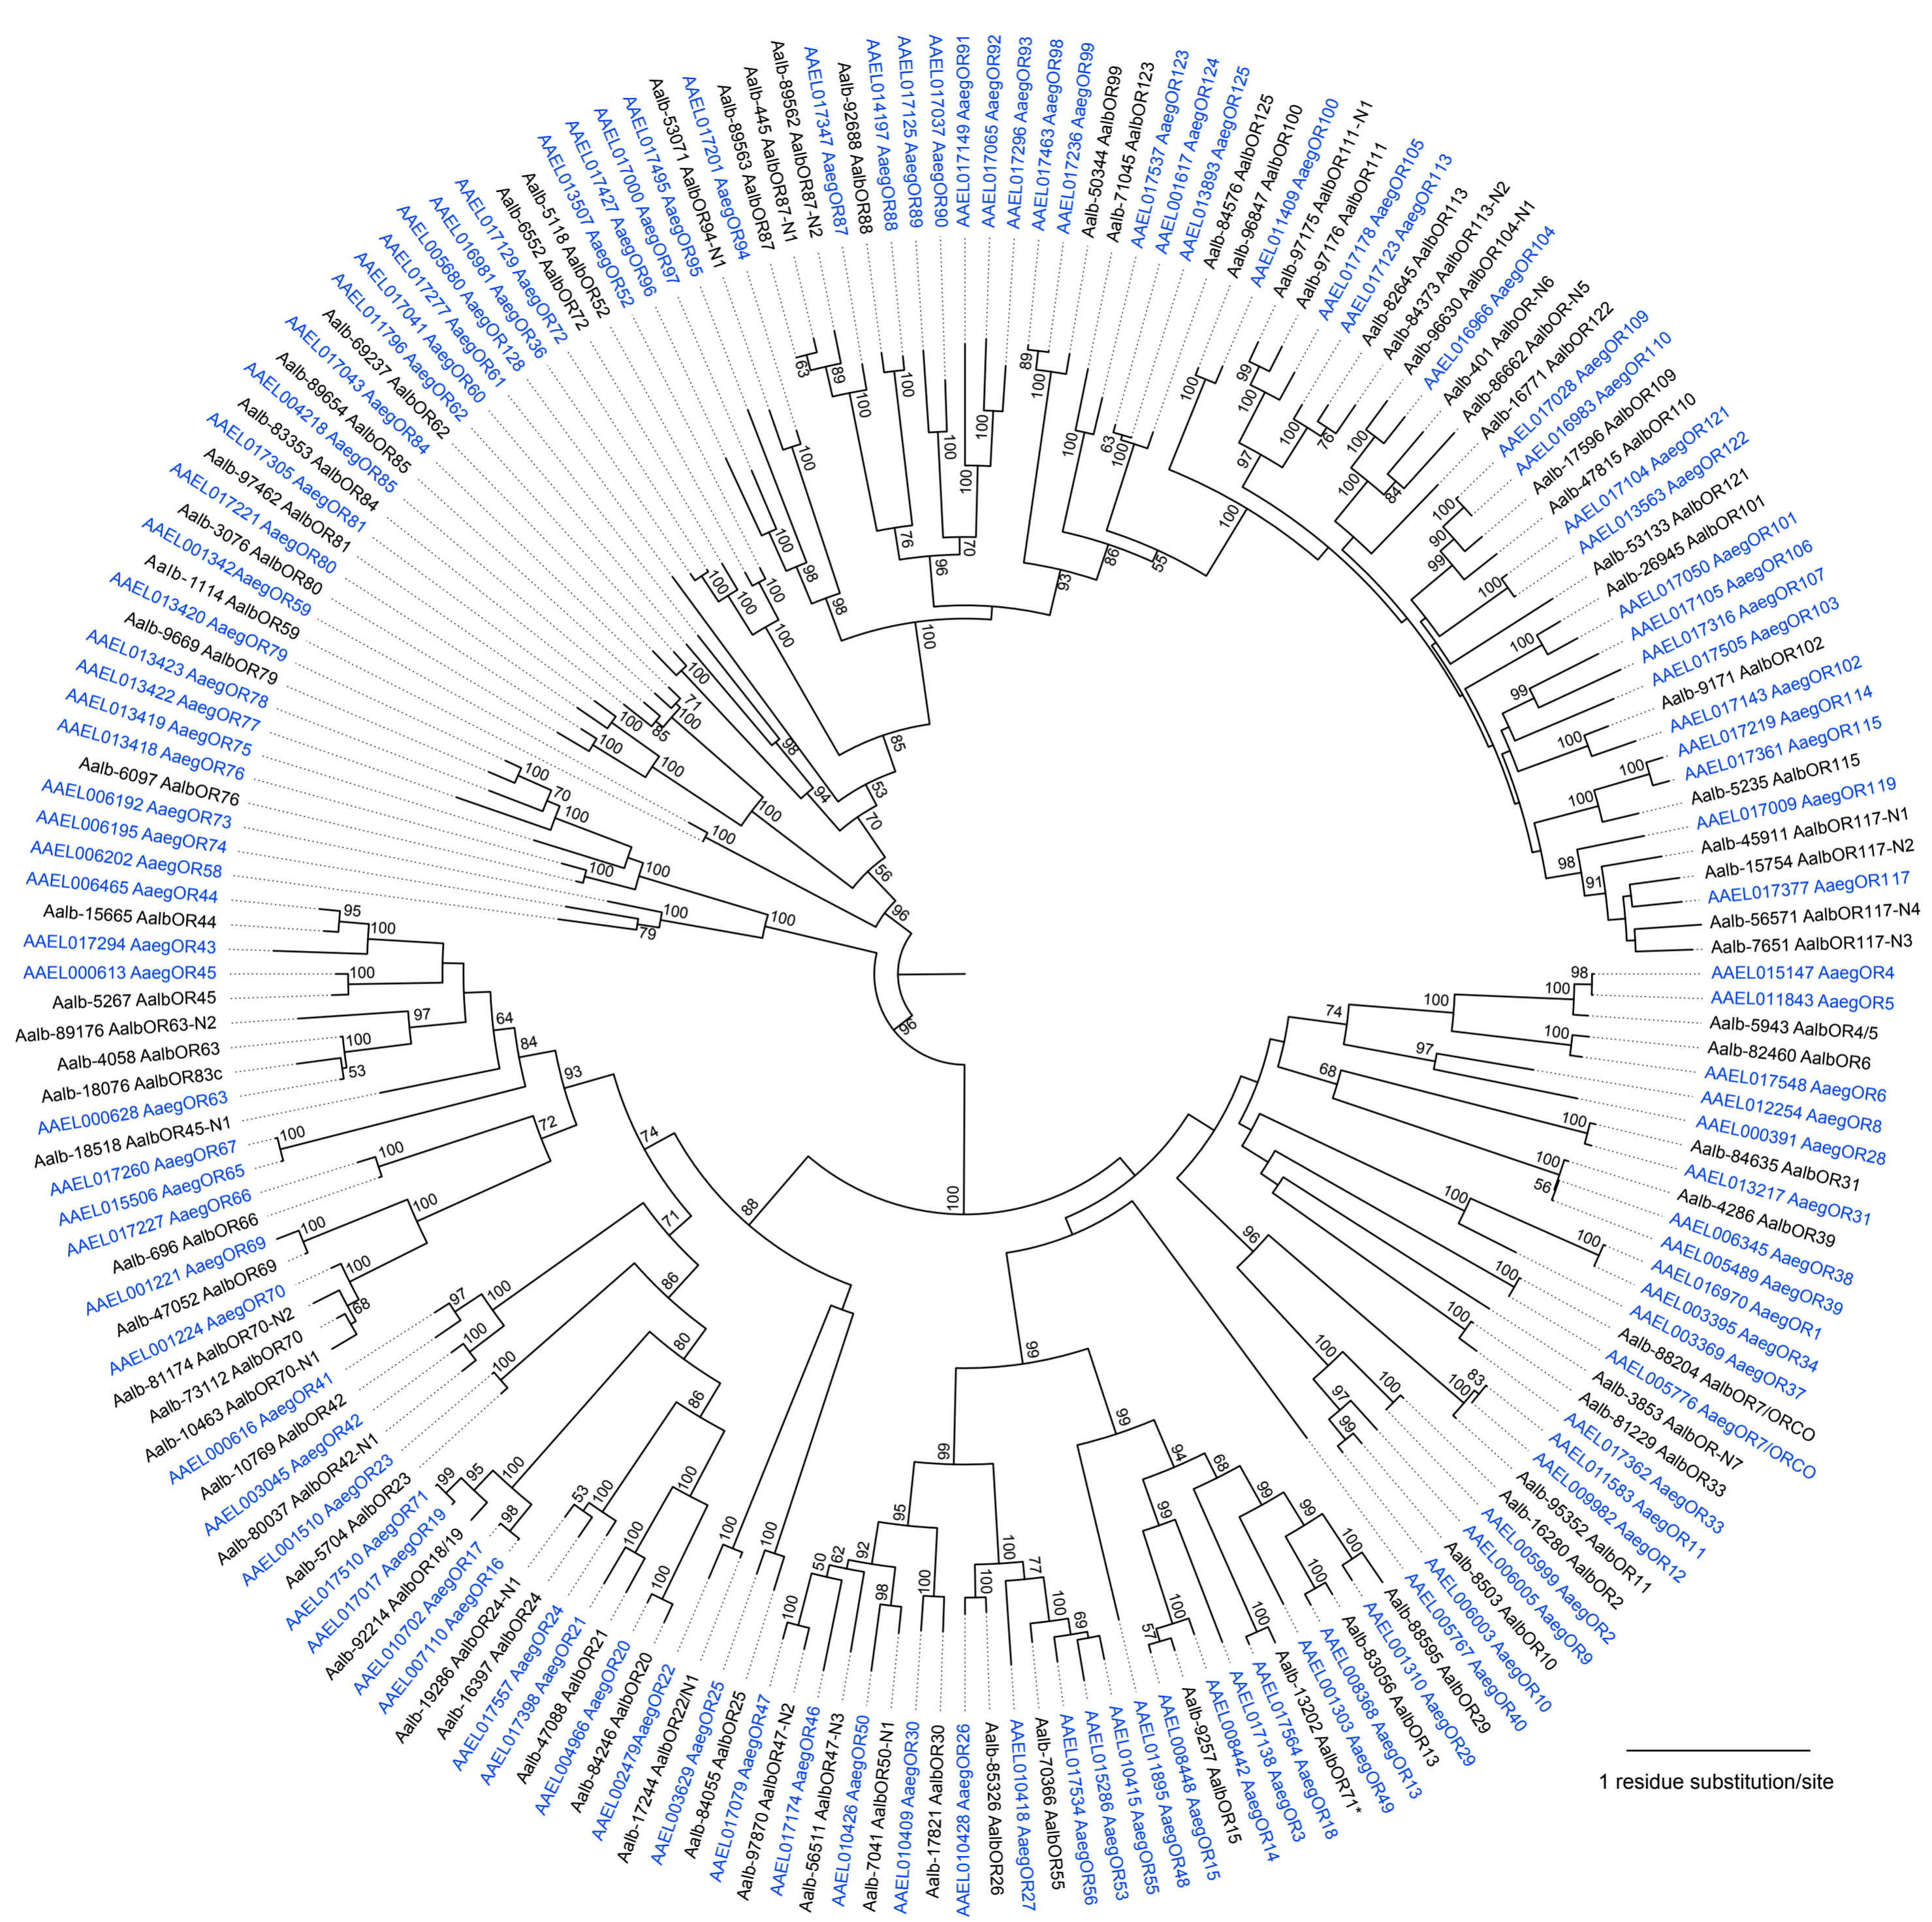

1 residue substitution/site
